# Supplementary material for: Diversity and functional analysis of light‐driven pumping rhodopsins in marine Flavobacteria
Source: PubMed Central journal article supplement (PMC4831467; doi:10.1002/mbo3.321), 2015-12-13

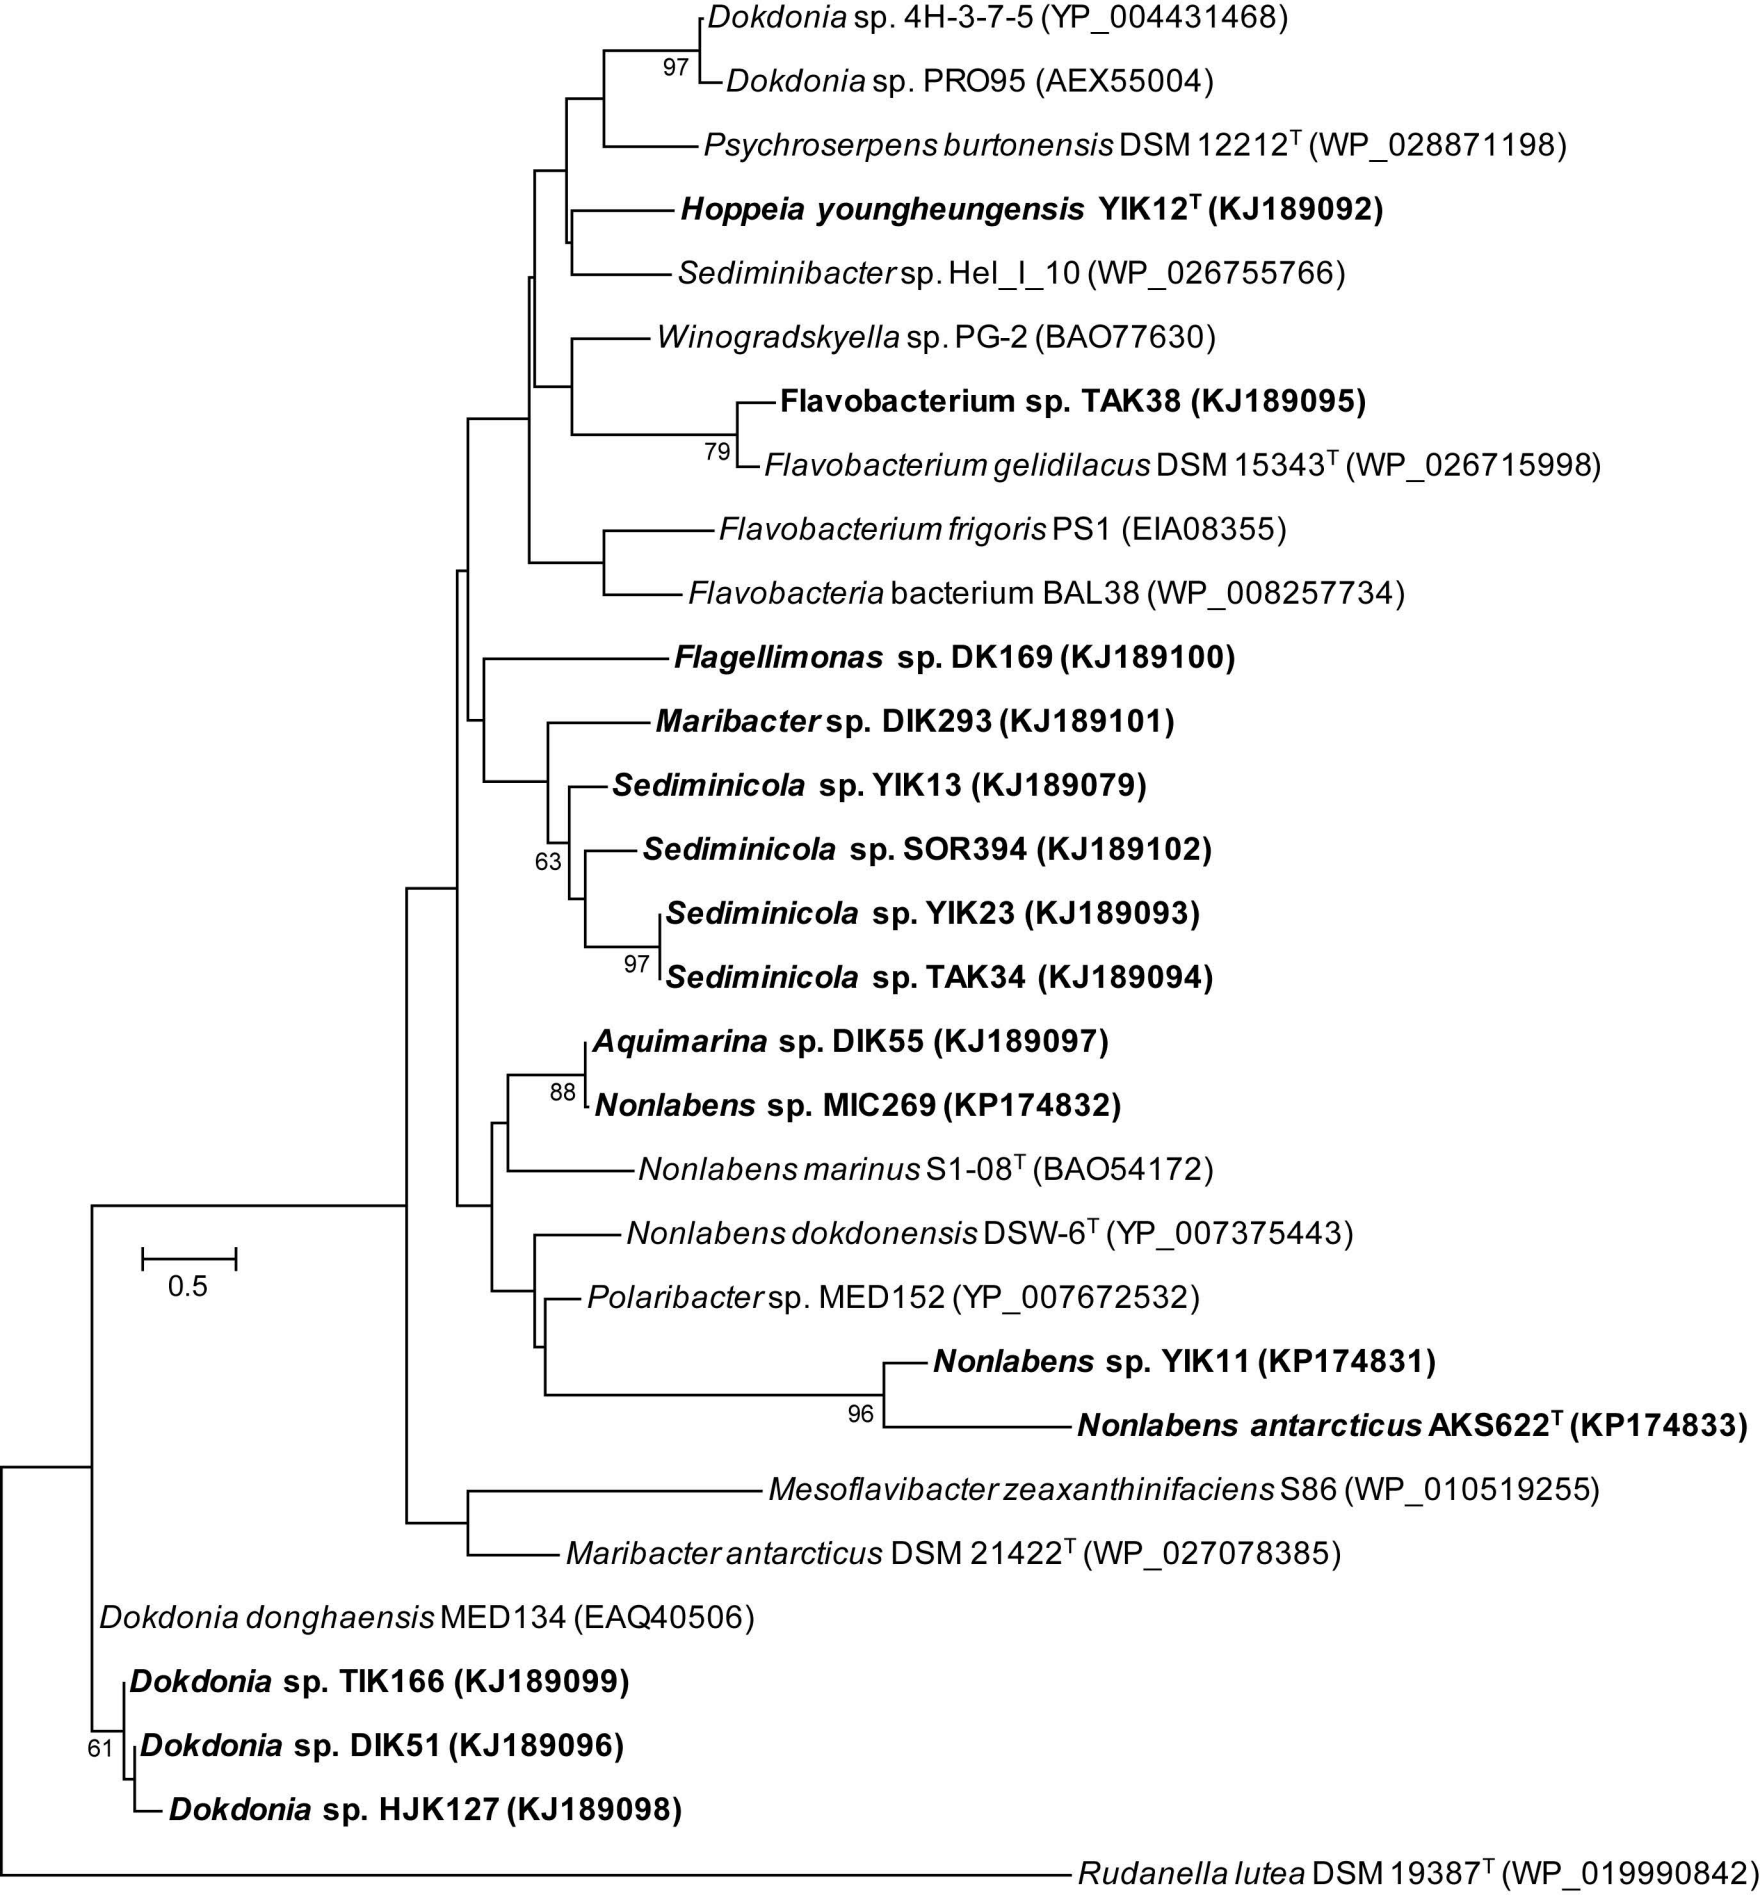

Supplement: MBO3-5-212-s002.pdf [file MBO3-5-212-s002.pdf]
